# Supplementary material
Source: ML conference proceedings conference paper supplement (https://aclanthology.org/D16-1095)
Supplement: Attachment [file D16-1095.Attachment.pdf]

# Supplementary Material for “A General Regularization Framework for Domain Adaptation”

Wei Lu<sup>1</sup> and Hai Leong Chieu<sup>2</sup> and Jonathan Löfgren<sup>3</sup>

<sup>1</sup>Singapore University of Technology and Design

<sup>2</sup>DSO National Laboratories

<sup>3</sup>Uppsala University

luwei@sutd.edu.sg, chaileon@dso.org.sg, lofgren021@gmail.com

## Abstract

This is the supplementary material for (Lu et al., 2016). Here we present a detailed proof of Lemma 2.2 and give details to show how we arrive at Equation 7 in the main paper.

## 1 Proof of Lemma 2.2

**Lemma 2.2** For any vectors  $\mathbf{v}_1, \mathbf{v}_2, \dots, \mathbf{v}_N \in \mathbf{R}^m$ , any scalars  $\lambda_0, \lambda_1, \dots, \lambda_N \in \mathbf{R}^+$ , let  $\mathbf{v}_0 = (\sum_{i=1}^N \lambda_i \mathbf{v}_i) / \lambda_0$ , then the following always holds:

$$\begin{aligned} & \lambda_0 \|\mathbf{v}_0\|^2 + \sum_{i=1}^N \lambda_i \|\mathbf{v}_i\|^2 \\ = & \sum_{i=1}^N \eta_{0,i} \|\mathbf{v}_i + \mathbf{v}_0\|^2 + \sum_{1 \leq j < k \leq N} \eta_{j,k} \|\mathbf{v}_j - \mathbf{v}_k\|^2 \end{aligned}$$

where

$$\eta_{i,j} = \frac{\lambda_i \lambda_j}{\sum_{l=0}^N \lambda_l}$$

for all  $0 \leq i < j \leq N$ .

**Proof** First note that  $\sum_{j=0}^N \eta_{j,k} = \lambda_k$  and since  $\lambda_0 \mathbf{v}_0 = \sum_{j=1}^N \lambda_j \mathbf{v}_j$  we also have

$$\sum_{j=1}^N \sum_{k=1}^N \eta_{j,k} \mathbf{v}_j \cdot \mathbf{v}_k = \sum_{i=1}^N \eta_{0,i} \mathbf{v}_i \cdot \mathbf{v}_0 = \eta_{0,0} \|\mathbf{v}_0\|^2.$$

Although we formally specify  $i < j$  for the parameters  $\eta_{j,k}$  we will relax this for now to simplify the notation. We denote the terms on the right hand in

original equation by  $A$  and  $B$  respectively and expand them as follows:

$$\begin{aligned} A &= \sum_{i=1}^N \eta_{0,i} \|\mathbf{v}_i + \mathbf{v}_0\|^2 \\ &= \sum_{i=1}^N \eta_{0,i} \|\mathbf{v}_i\|^2 + \sum_{i=1}^N \eta_{0,i} \|\mathbf{v}_0\|^2 \\ &\quad + 2 \sum_{i=1}^N \eta_{0,i} \mathbf{v}_i \cdot \mathbf{v}_0 \\ &= \sum_{i=1}^N \eta_{0,i} \|\mathbf{v}_i\|^2 + (\lambda_0 - \eta_{0,0}) \|\mathbf{v}_0\|^2 \\ &\quad + 2\eta_{0,0} \|\mathbf{v}_0\|^2 \\ &= \sum_{i=1}^N \eta_{0,i} \|\mathbf{v}_i\|^2 + \lambda_0 \|\mathbf{v}_0\|^2 + \eta_{0,0} \|\mathbf{v}_0\|^2 \\ B &= \sum_{1 \leq j < k \leq N} \eta_{j,k} \|\mathbf{v}_j - \mathbf{v}_k\|^2 \\ &= \frac{1}{2} \sum_{j=1}^N \sum_{k=1}^N \eta_{j,k} \|\mathbf{v}_j - \mathbf{v}_k\|^2 \\ &= \sum_{j=1}^N \sum_{k=1}^N \eta_{j,k} \|\mathbf{v}_j\|^2 - \sum_{j=1}^N \sum_{k=1}^N \eta_{j,k} \mathbf{v}_j \cdot \mathbf{v}_k \\ &= \sum_{j=1}^N \left( \sum_{k=0}^N \eta_{j,k} \|\mathbf{v}_j\|^2 - \eta_{j,0} \|\mathbf{v}_j\|^2 \right) \\ &\quad - \eta_{0,0} \|\mathbf{v}_0\|^2 \\ &= \sum_{j=1}^N \lambda_j \|\mathbf{v}_j\|^2 - \sum_{j=1}^N \eta_{0,j} \|\mathbf{v}_j\|^2 - \eta_{0,0} \|\mathbf{v}_0\|^2 \end{aligned}$$

The full right hand side is  $A + B$  and cancelling the

terms gives us

$$\mathbf{RHS} = A+B = \lambda_0 \|\mathbf{v}_0\|^2 + \sum_{i=1}^N \lambda_i \|\mathbf{v}_i\|^2 = \mathbf{LHS}. \quad \blacksquare$$

## 2 Proof of Equation 7

In the main paper, we defined

$$\mathbf{w}'_0 = \frac{1}{\sum_{l=0}^N \lambda_l} \sum_{i=1}^N \lambda_i \mathbf{w}_i^*, \quad (1)$$

and we also defined

$$\mathbf{w}'_i = \mathbf{w}_i^* - \mathbf{w}'_0 \quad (2)$$

We need to prove the following equation (Equation 7 in the main paper):

$$\mathbf{w}'_0 = \left( \sum_{i=1}^N \lambda_i \mathbf{w}'_i \right) / \lambda_0 \quad (3)$$

**Proof** Since

$$\mathbf{w}'_0 = \frac{1}{\sum_{l=0}^N \lambda_l} \sum_{i=1}^N \lambda_i \mathbf{w}_i^*, \quad (4)$$

we have:

$$\sum_{i=1}^N \lambda_i \mathbf{w}_i^* = \left( \sum_{l=0}^N \lambda_l \right) \mathbf{w}'_0 \quad (5)$$

Since

$$\mathbf{w}'_i = \mathbf{w}_i^* - \mathbf{w}'_0, \quad (6)$$

we have:

$$\begin{aligned} \sum_{i=1}^N \lambda_i \mathbf{w}'_i &= \sum_{i=1}^N \lambda_i (\mathbf{w}_i^* - \mathbf{w}'_0) \\ &= \sum_{i=1}^N (\lambda_i \mathbf{w}_i^* - \lambda_i \mathbf{w}'_0) \\ &= \sum_{i=1}^N \lambda_i \mathbf{w}_i^* - \sum_{i=1}^N \lambda_i \mathbf{w}'_0 \end{aligned} \quad (7)$$

Based on Equation 5 above, we have:

$$\begin{aligned} \sum_{i=1}^N \lambda_i \mathbf{w}'_i &= \sum_{i=1}^N \lambda_i \mathbf{w}_i^* - \sum_{i=1}^N \lambda_i \mathbf{w}'_0 \\ &= \left( \sum_{l=0}^N \lambda_l \right) \mathbf{w}'_0 - \left( \sum_{i=1}^N \lambda_i \right) \mathbf{w}'_0 \\ &= \lambda_0 \mathbf{w}'_0 \end{aligned} \quad (8)$$

Therefore, we have:

$$\mathbf{w}'_0 = \left( \sum_{i=1}^N \lambda_i \mathbf{w}'_i \right) / \lambda_0 \quad \blacksquare \quad (9)$$

## References

- Wei Lu, Hai Leong Chieu, and Jonathan Löfgren. 2016. A general regularization framework for domain adaptation. In *In Proceedings of EMNLP*.
